# Supplementary material
Source: Research Square preprint supplement (doi:10.21203/rs.3.rs-9763688/v1)
Supplement: Supplementary file 1 [file 258af6237e2e7cab6321f8d4.docx]

| **Table 2.** Weighted OLS regression of cancer screening rates on regional-level covariates. | | | | | | | | | | | | | | | | | |
| --- | --- | --- | --- | --- | --- | --- | --- | --- | --- | --- | --- | --- | --- | --- | --- | --- | --- |
| **Variables** | **2018** | | | | | | | | | | | | | | | | |
| **stomach** | | | **colorectal** | | | **liver** | | | | **breast** | | | | **cervix** | | |
| **β** | **Standard** | **p-value** | **β** | **Standard** | **p-value** | **β** | **Standard** | **p-value** | **β** | | **Standard** | **p-value** | **β** | | **Standard** | **p-value** |
| **error** | **error** | **error** | **error** | **error** |
| Elderly population ratio | 0.226 | 0.101 | 0.025 | 0.203 | 0.122 | 0.097 | -0.42 | 0.118 | <0.001 | 0.112 | | 0.12 | 0.351 | -0.466 | | 0.093 | <0.001 |
| Population density, people/km2 | 0.004 | 0.075 | 0.956 | 0.178 | 0.084 | 0.034 | -0.157 | 0.089 | 0.078 | 0.269 | | 0.075 | <0.001 | 0.196 | | 0.062 | 0.002 |
| National basic livelihood security recipient rate | 0.119 | 0.112 | 0.293 | 0.074 | 0.101 | 0.462 | 0.28 | 0.111 | 0.012 | -0.062 | | 0.104 | 0.554 | -0.071 | | 0.087 | 0.415 |
| General health examination rate | 0.189 | 0.092 | 0.042 | 0.116 | 0.092 | 0.207 | 0.134 | 0.094 | 0.156 | 0.39 | | 0.089 | <0.001 | 0.199 | | 0.085 | 0.02 |
| Obesity rate self report standardization rate | 0.146 | 0.067 | 0.03 | 0.029 | 0.086 | 0.74 | -0.04 | 0.08 | 0.615 | 0.157 | | 0.1 | 0.119 | -0.03 | | 0.076 | 0.697 |
| Hypertension diagnosis experience rate | 0.012 | 0.065 | 0.853 | 0.294 | 0.078 | <0.001 | -0.167 | 0.087 | 0.056 | 0.053 | | 0.078 | 0.501 | -0.02 | | 0.072 | 0.781 |
| Diabetes diagnosis experience rate | 0.101 | 0.076 | 0.188 | 0.049 | 0.08 | 0.538 | -0.025 | 0.078 | 0.75 | 0.105 | | 0.086 | 0.22 | 0.074 | | 0.071 | 0.302 |
| Number of clinic per 100000 | 0.077 | 0.081 | 0.343 | -0.207 | 0.136 | 0.13 | -0.028 | 0.16 | 0.861 | 0.075 | | 0.07 | 0.29 | 0.087 | | 0.056 | 0.12 |
| Financial independence | -0.326 | 0.135 | 0.017 | 0.188 | 0.131 | 0.153 | -0.078 | 0.128 | 0.541 | -0.084 | | 0.122 | 0.493 | -0.109 | | 0.107 | 0.311 |
| Health expenditure cost | 0.153 | 0.08 | 0.055 | 0.028 | 0.071 | 0.694 | 0.045 | 0.09 | 0.618 | 0.141 | | 0.059 | 0.017 | 0.133 | | 0.049 | 0.007 |
| **Variables** | **2022** | | | | | | | | | | | | | | | | |
| **stomach** | | | **colorectal** | | | **liver** | | | | **breast** | | | | **cervix** | | |
| **β** | **Standard** | **p-value** | **β** | **Standard** | **p-value** | **β** | **Standard** | **p-value** | **β** | | **Standard** | **p-value** | **β** | | **Standard** | **p-value** |
| **error** | **error** | **error** | **error** | **error** |
| Elderly population ratio | -0.062 | 0.102 | 0.542 | 0.101 | 0.123 | 0.413 | -0.416 | 0.11 | <0.001 | -0.212 | | 0.081 | 0.009 | -0.481 | | 0.067 | <0.001 |
| Population density, people/km2 | 0.026 | 0.071 | 0.716 | 0.177 | 0.09 | 0.051 | -0.286 | 0.078 | <0.001 | 0.176 | | 0.048 | <0.001 | 0.205 | | 0.037 | <0.001 |
| National basic livelihood security recipient rate (%) | 0.179 | 0.106 | 0.092 | 0.021 | 0.108 | 0.844 | 0.333 | 0.082 | <0.001 | 0.141 | | 0.073 | 0.054 | 0.072 | | 0.063 | 0.25 |
| General health examination rate | 0.502 | 0.086 | <0.001 | 0.245 | 0.108 | 0.024 | 0.103 | 0.092 | 0.266 | 0.582 | | 0.067 | <0.001 | 0.304 | | 0.059 | <0.001 |
| Obesity rate self report standardization rate | -0.057 | 0.067 | 0.397 | 0.209 | 0.096 | 0.031 | -0.029 | 0.084 | 0.728 | 0.083 | | 0.056 | 0.143 | 0.022 | | 0.05 | 0.662 |
| Hypertension diagnosis experience rate | 0.018 | 0.07 | 0.801 | 0.256 | 0.074 | 0.001 | -0.195 | 0.071 | 0.006 | 0.123 | | 0.052 | 0.017 | 0.06 | | 0.046 | 0.187 |
| Diabetes diagnosis experience rate | 0.041 | 0.076 | 0.593 | -0.019 | 0.074 | 0.793 | -0.06 | 0.074 | 0.419 | -0.027 | | 0.054 | 0.623 | -0.102 | | 0.05 | 0.043 |
| Number of clinic per 100000 | 0.059 | 0.061 | 0.33 | -0.104 | 0.069 | 0.132 | 0.051 | 0.114 | 0.653 | 0.059 | | 0.053 | 0.261 | 0.074 | | 0.049 | 0.129 |
| Financial independence | -0.203 | 0.143 | 0.156 | 0.225 | 0.15 | 0.134 | -0.347 | 0.106 | 0.001 | -0.016 | | 0.096 | 0.866 | -0.039 | | 0.084 | 0.643 |
| Health expenditure cost | 0.165 | 0.095 | 0.083 | -0.004 | 0.1 | 0.969 | 0.125 | 0.092 | 0.176 | 0.154 | | 0.061 | 0.012 | 0.173 | | 0.049 | <0.001 |

β = standardized coefficient from population-weighted ordinary least squares models; SE = standard error of the standardized coefficient.
